# Supplementary material
Source: PubMed Central journal article supplement (PMC5931134)
Supplement: jciinsight-3-99488-s001.pdf [file jciinsight-3-99488-s001.pdf]

Beta chain - VDJ regions

ATGGCCCCGGGGCTTTTGTGTTGGGCCTTGCTTTGTTTGCTTGGGGCAGGCTTGGTGGATGCTGGAGTCA  
CACAGTCACCCACACACCTCATTA~~AAA~~ACCAGGGGACAACAAGTCACTCTGCGCTGCAGTCCTAAGTCAGG  
CCATGACACAGTTTCTGGTATCAACAGGCTCTGGGGCAGGGCCCTCAGTTCATTTTCCAATATTACGAG  
GAAGAGGAACGCCAACGCGGTAATTTCCCCGATCGGTTCTCTGGGCACCAGTTC~~CCAA~~ACTACTCAAGTG  
AGTTGAACGTAAATGCTCTCCTCCTCGGAGACTCCGCCCTCTACTTGTGTGCCAGTTCCTTTGGTTGGCG  
GGGCGGCCGATACAATGAACAATTTTTTGGACCTGGTACTCGGCTGACCGTGCTA

Beta chain - murine constant region

GAGGACCTGCGCAACGTCACCCACCAAAGGTCAGTTTGTGTTGAGCCATCAAAGGCGGAGATCGCCAACA  
AACAGAAAGCTACGCTCGTGTGTTGGCTCGGGCTTCTTCCAGACCACGTAGAACTTTCCTGGTGGGT  
CAATGGAAAGGAGGTTCAATTCGGAGTGTGCACTGATCCCCAAGCGTACAAGGAATCCAACTATAGCTAC  
TGTCTCTCATCTCGGCTCCGGGTGAGTGCACATTCCTGGCATAATCCTCGGAACCACTTTCGATGCCAAG  
TGCAGTTTCATGGGTTGAGCGAGGAAGACAAGTGGCCCCGAGGGCAGTCC~~TAA~~ACCAGTCACTCAAACAT  
AAGCGCCGAGGCATGGGGTAGAGCCGATTGTGGGATTACTAGCGCTTCATACCAACAAGGGGTATTGAGC  
GCTACAATTC~~TTT~~TACGAAATTCCTCCTCGGCAAGGCGACGCTCTACGCCGTAAGTGTCTACTCTCGTGG  
TTATGGCAATGGTGAACGGAAAAACAGC

Furin-P2A Linker

AGAGCCAAAAGAAGTGGTTCTGGCGCGACGAATTTTAGTTTGCTTAAGCAAGCCGGAGATGTGGAGGAAA  
ATCCTGGACCG

Alpha chain - VDJ regions

ATGTGGGGTGTCTTCCTTTTGTACGTCAGCATGAAGATGGGAGGCACTACTGGGCAAACATAGATCAGC  
CTACCGAAATGACTGCTACCGAGGGAGCCATTGTCCAATCAACTGCACCTATCAGACTAGCGGCTTCAA  
TGGACTCTTCTGGTACCAACAGCATGCGGGCGAAGCACCTACCTTCTTGTCTATAATGTCTTGGATGGT  
CTCGAAGAGAAAGGCAGATTCTCCAGTTTCTCAGCCGGAGCAAGGATACTCATATCTTCTCCTGAAAG  
AGCTTCAGATGAAGGATTCTGCATCCTATCTCTGTGCTTCAGTCGATGGCAATAACCGACTCGCCTTTGG  
AAAAGGAATCAAGTGGTCGTCATACCG

Beta chain - murine constant region

AATATTCAGAACCCCGAACCAGCCGTATATCAGTTGAAGGACCCAAGATCTCAGGATAGTACACTCTGTT  
TGTTTACGGACTTTGACTCACAAATCAACGTCCCGAAGACTATGGAAAGTGGTACGTTTATCACAGATAA  
GTGCGTTCTGGACATGAAGGCTATGGACTCAAAGAGCAACGGGGCAATTGCTTGGTCCAACCAGACAAGC  
TTTACCTGTCAGGACATTTTTAAGGAGACTAATGCTACTTATCCCTCCAGCGACGTTCCGTGTGATGCCA  
CTCTTACCGAGAAGTCTTTTGGACCGATATGAATCTCAACTTCCAGAATCTG**CTGGTGATCGTT**CTGCG  
GATCCTGCTTCTGAAGGTTGCAGGATTCAATCTTCTTATGACTCTCCGGCTCTGGTCTTCATGATAA

**Supplemental Figure 1. The codon-optimized nucleotide sequence of E7 TCR.** Cysteine modifications are underlined. Hydrophobic substitutions are in bold.

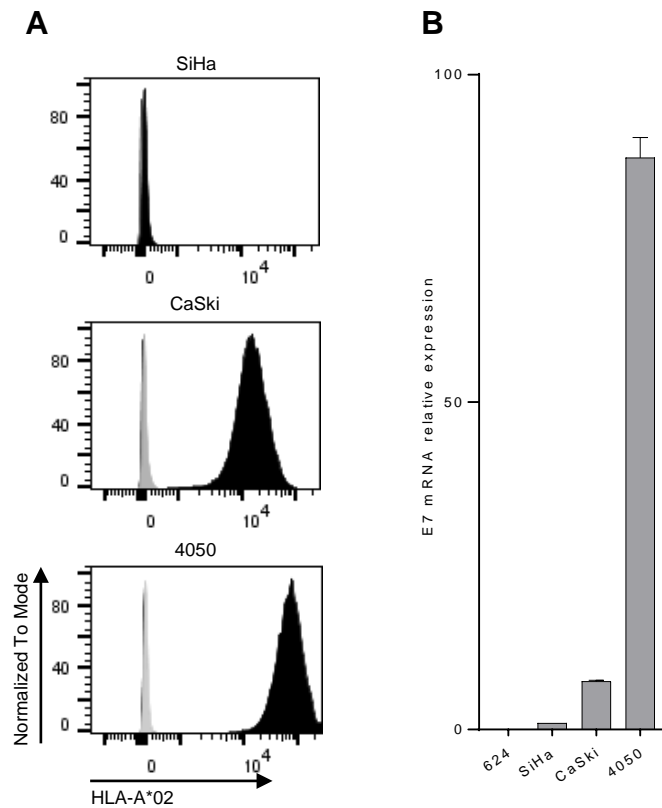

**Supplemental Figure 2. The expression of HLA-A\*02 and HPV-16 E7 in CaSki cells and 4050 cells.** (A) The expression level of HLA-A\*02 in CaSki cells and 4050 cells was assayed by flow cytometry using an APC-conjugated human anti-HLA-A\*02 antibody. SiHa is an HLA-A\*02-negative cell line. The control antibody (Clone: 27-35, Biolegend) is shaded gray. The HLA-A\*02 antibody (Clone: BB7.2, Biolegend) is shaded black. (B) The mRNA level in CaSki cells and 4050 cells was measured by qPCR using QuantStudio 3 Real-Time PCR System (ThermoFisher Scientific.). Results were normalized to GAPDH mRNA and are presented relative to the reference control, HPV-16 E7 mRNA in SiHa cells. Data represent the mean  $\pm$  SEM of 3 technical replicates.
